# Supplementary material for: Multiomics characterization implicates PTK7 in ovarian cancer EMT and cell plasticity and offers strategies for therapeutic intervention
Source: PubMed Central journal article supplement (PMC9386025; doi:10.1038/s41419-022-05161-5), 2022-08-17

Figure 1

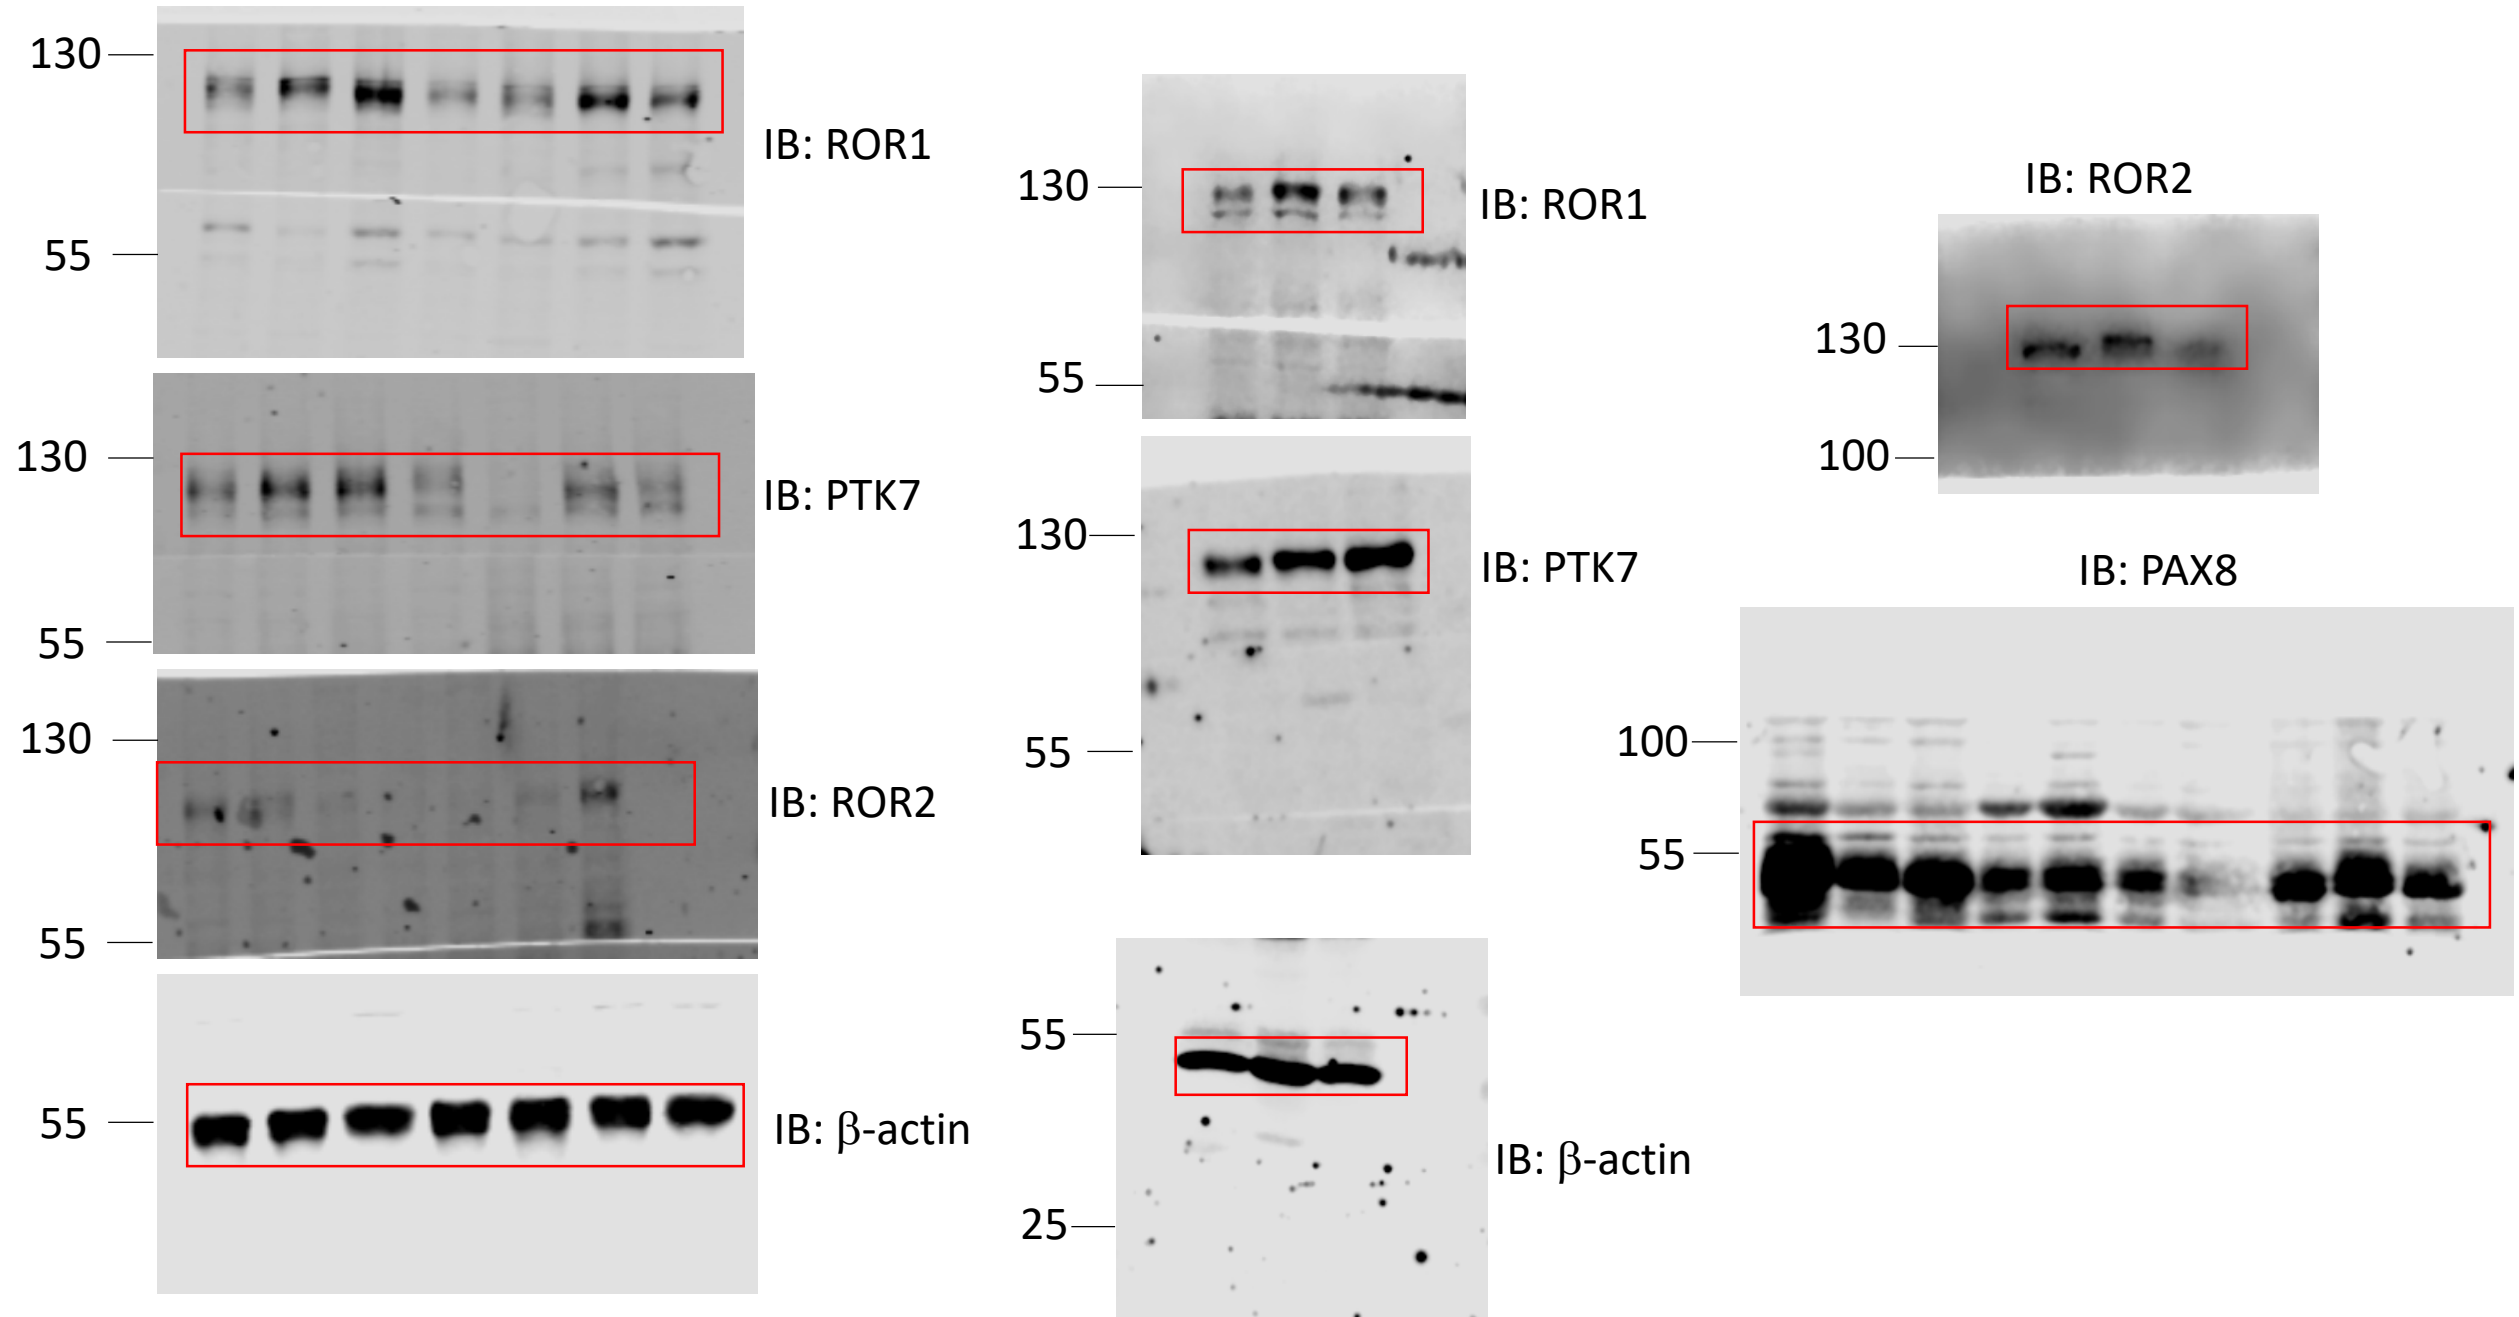

Figure 2

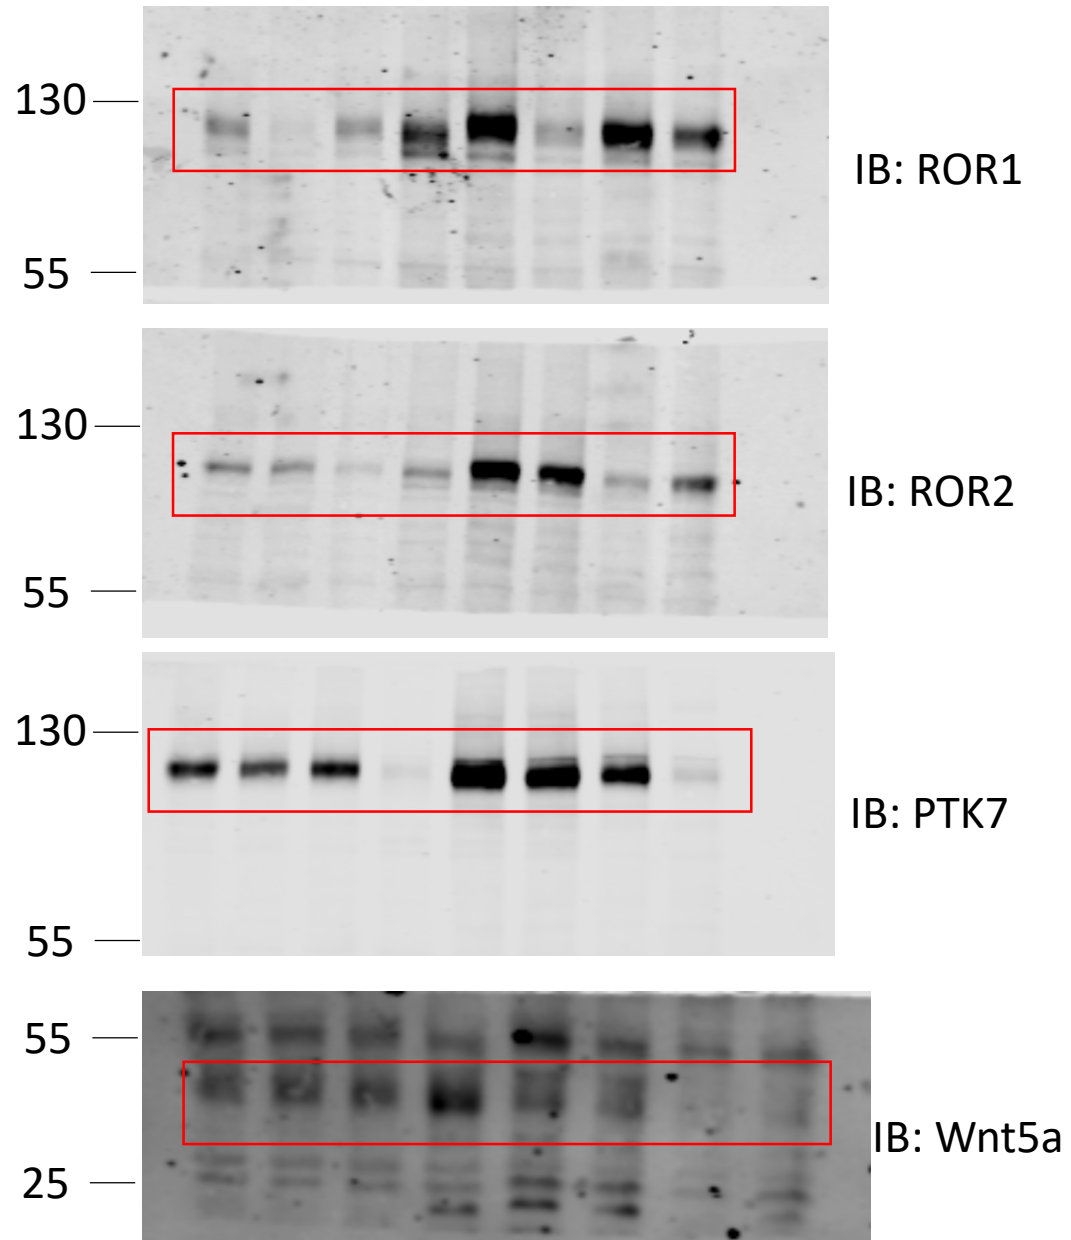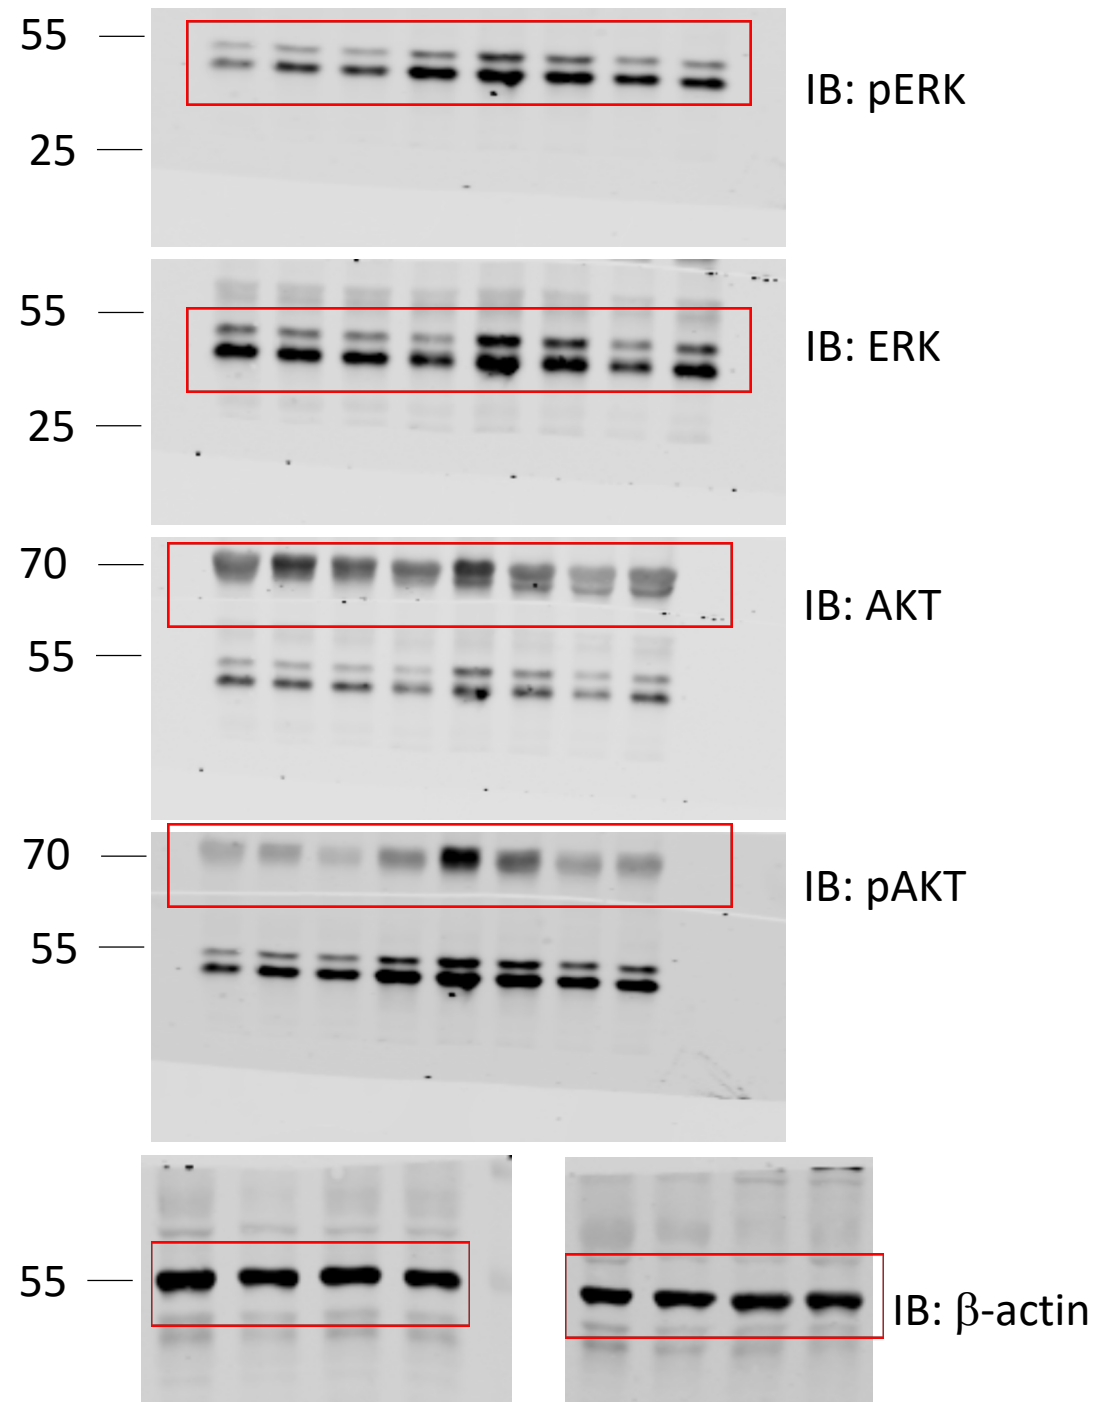

Figure 2

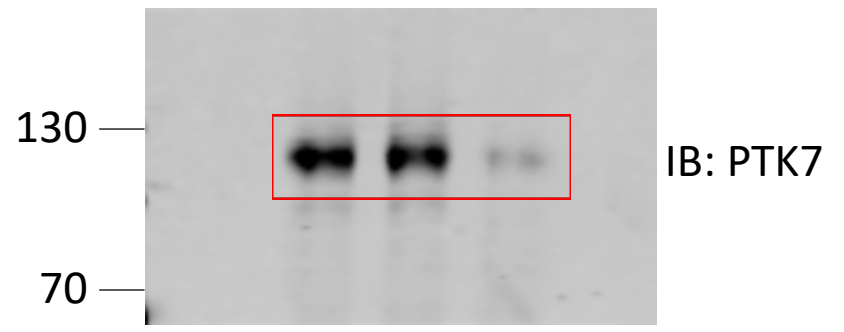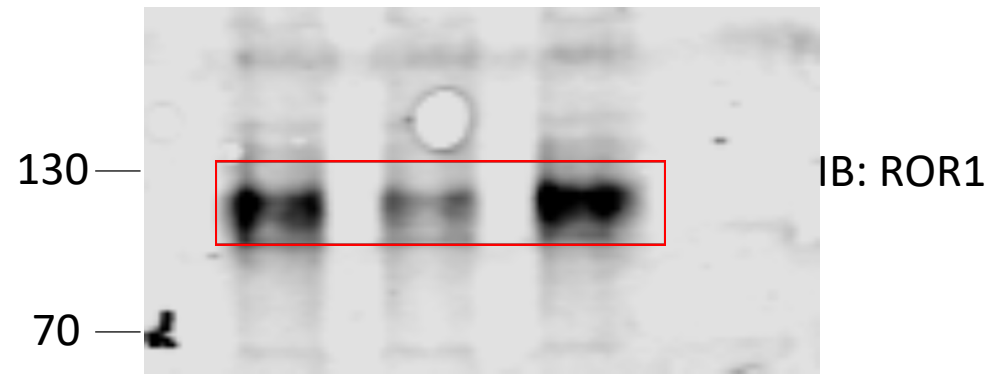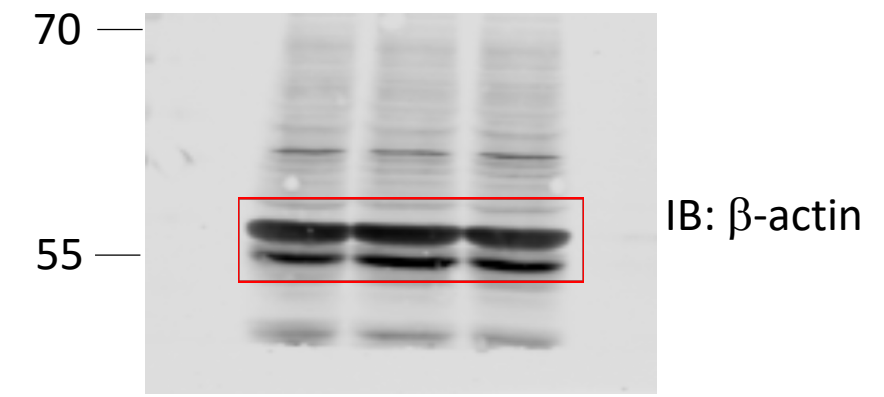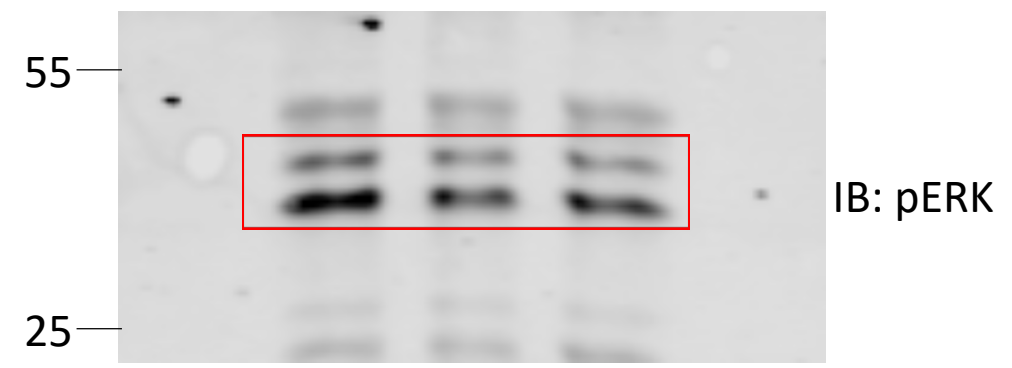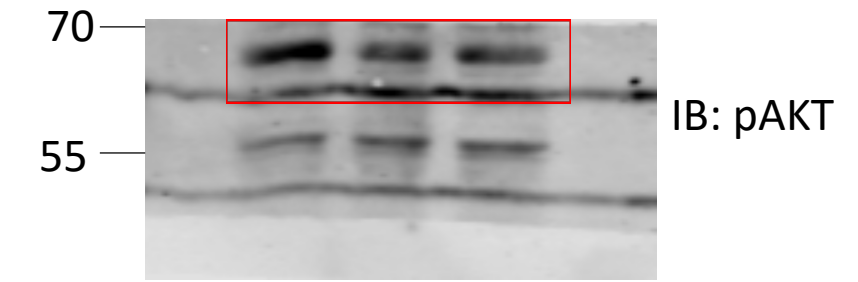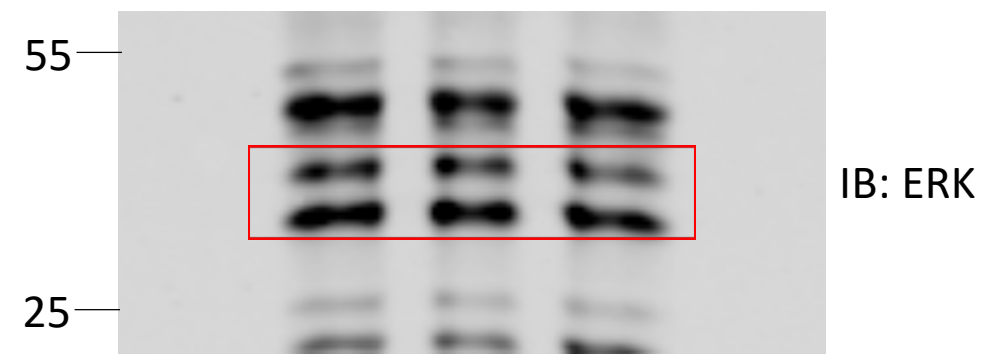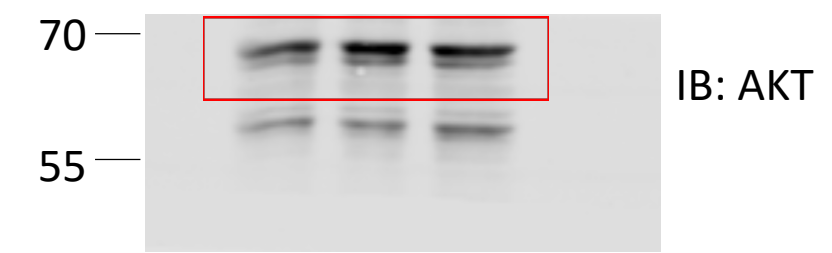

Figure 2

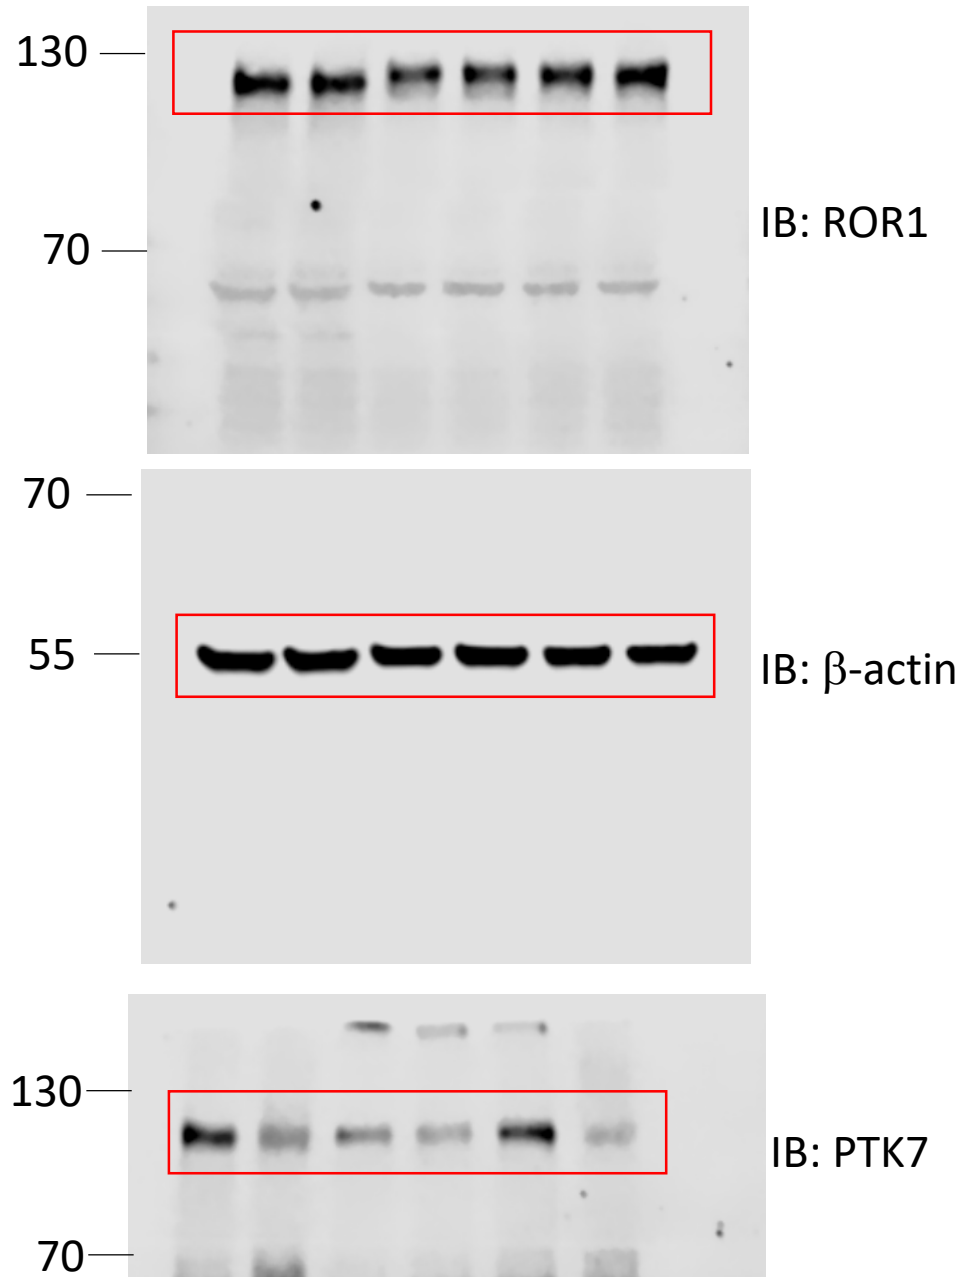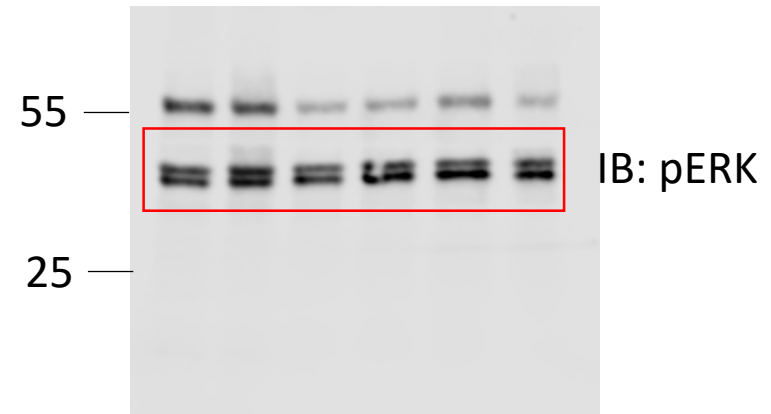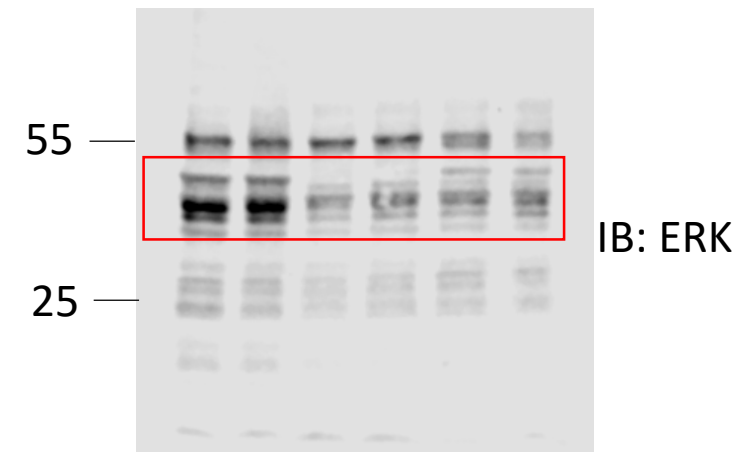

Figure 3

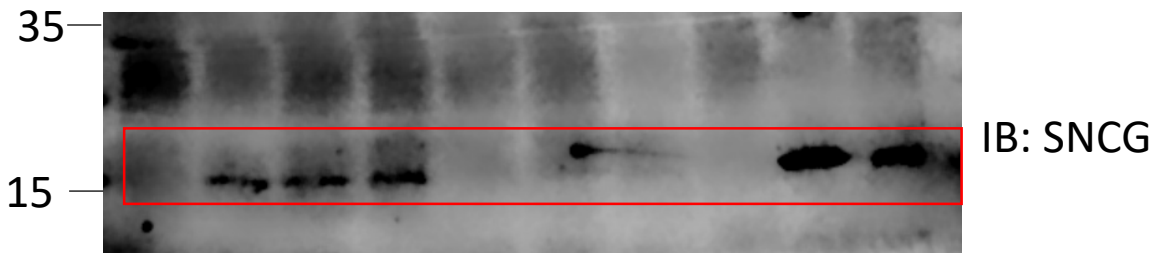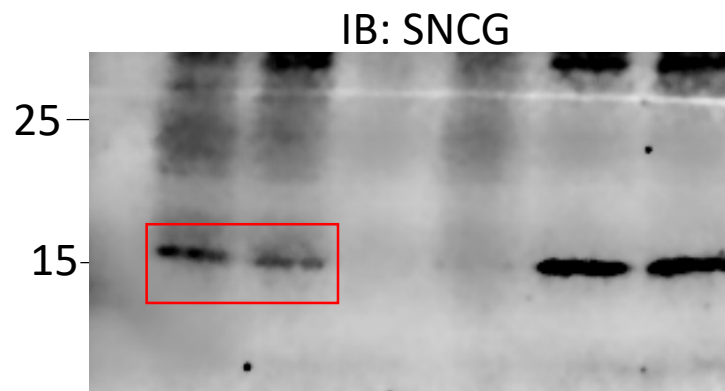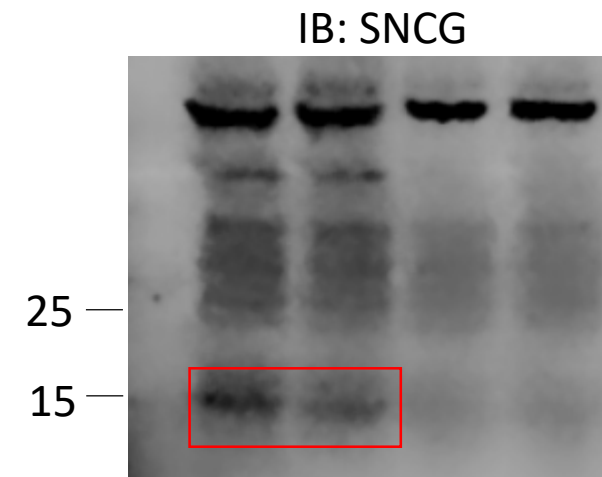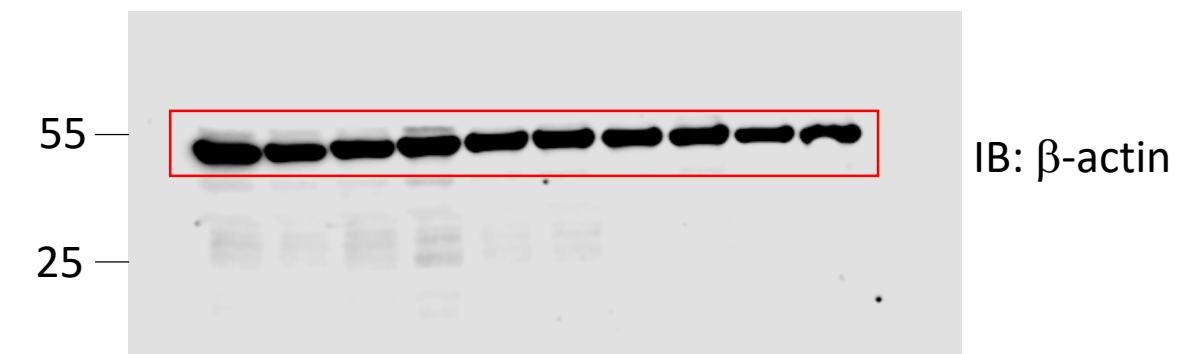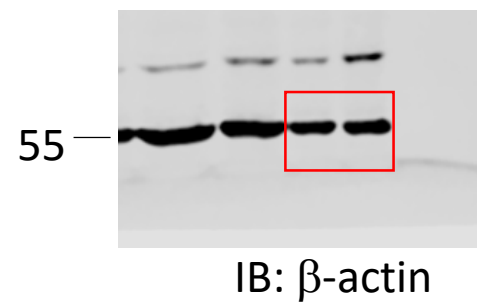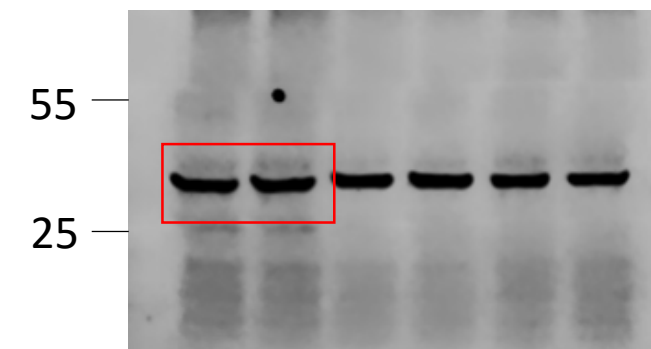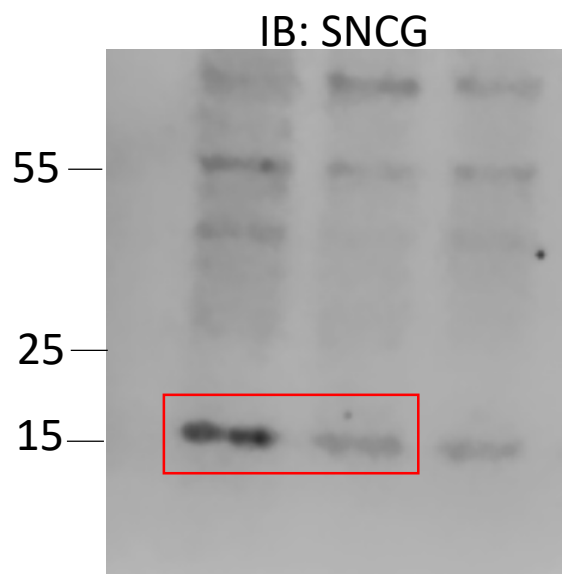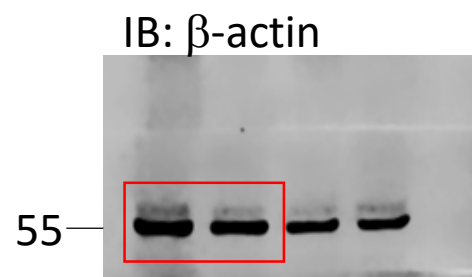

Figure 3

IB: PP1 $\gamma$

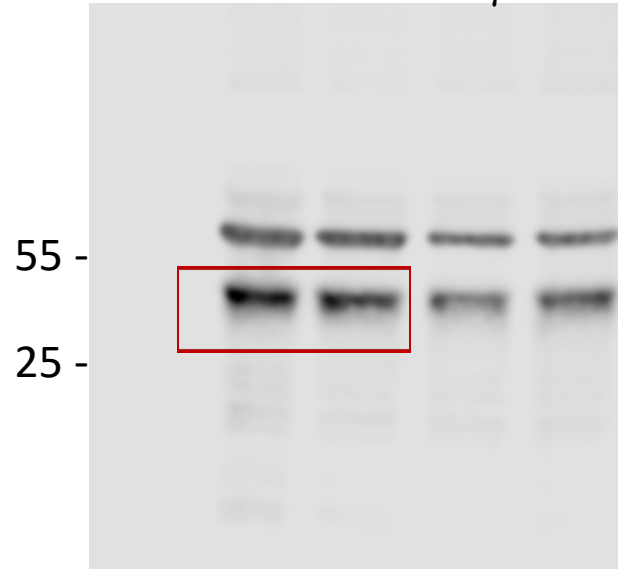

IB:  $\beta$ -actin

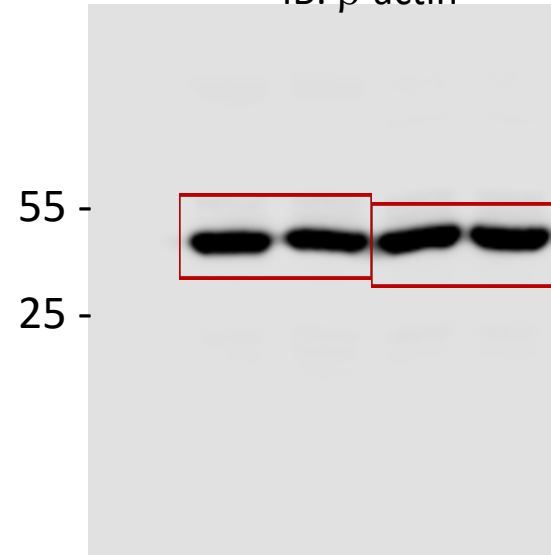

IB: PP1 $\gamma$

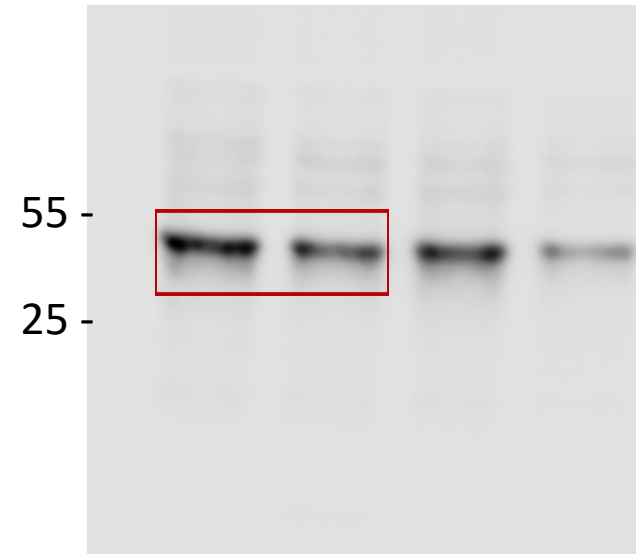

IB: PP1 $\gamma$

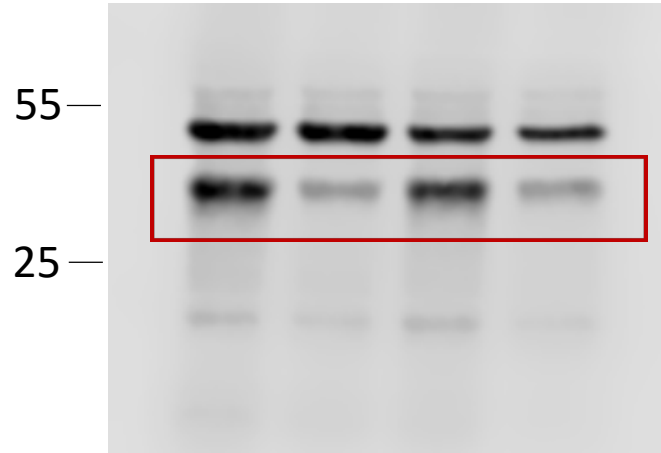

IB: PTK7

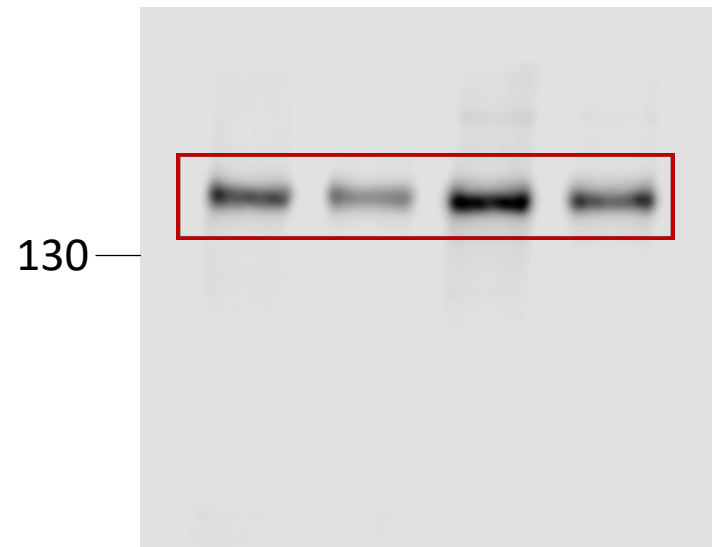

IB:  $\beta$ -actin

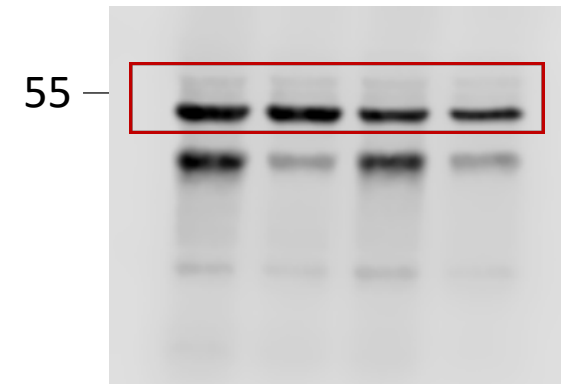

Figure 3

IB: PTK7

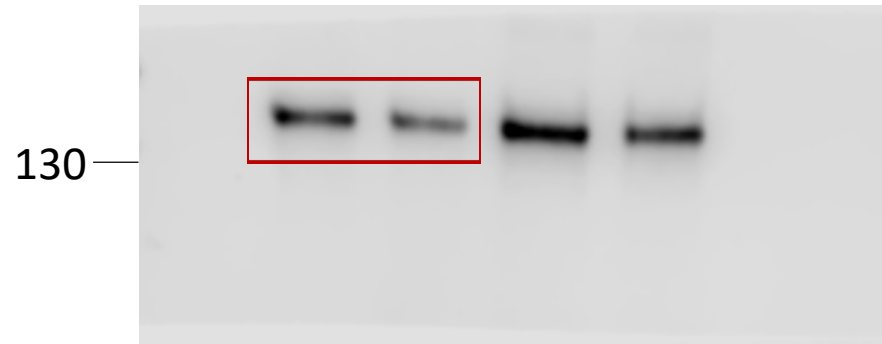

IB:  $\beta$ -actin

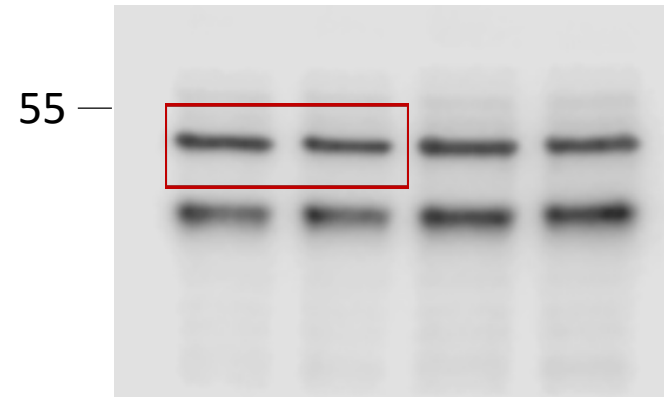

IB: SNCG

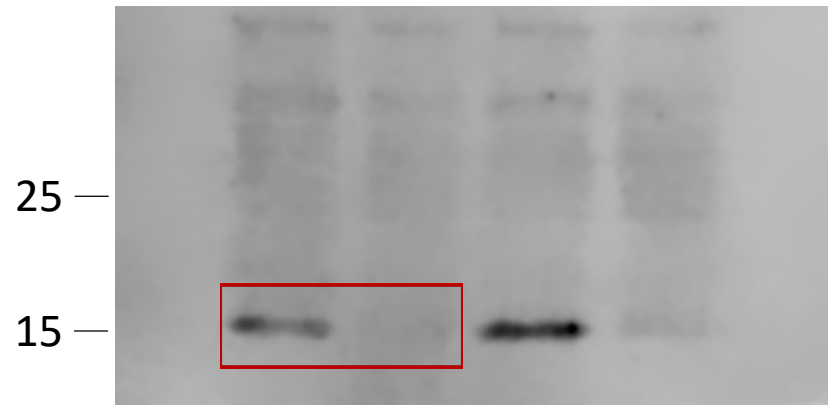

Figure 5

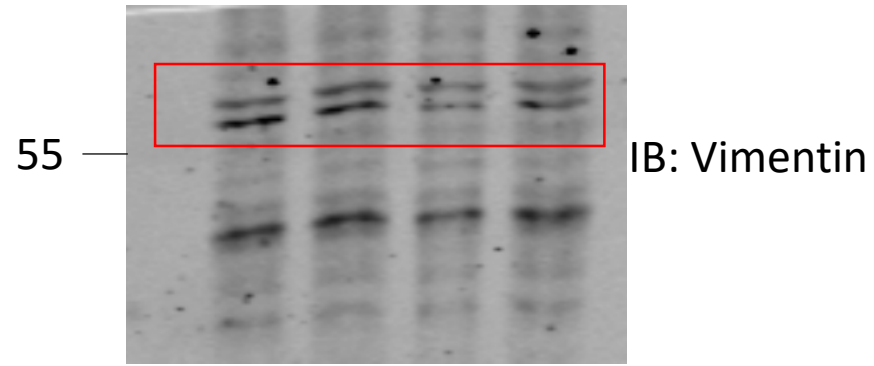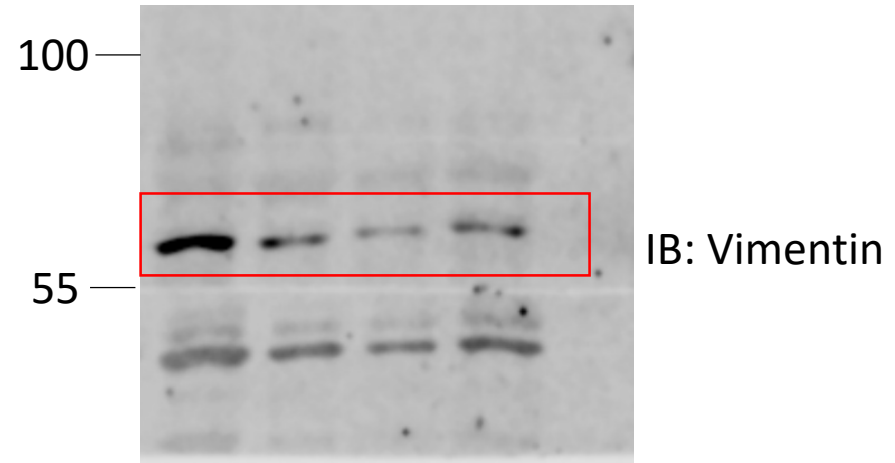

IB: E-cadherin

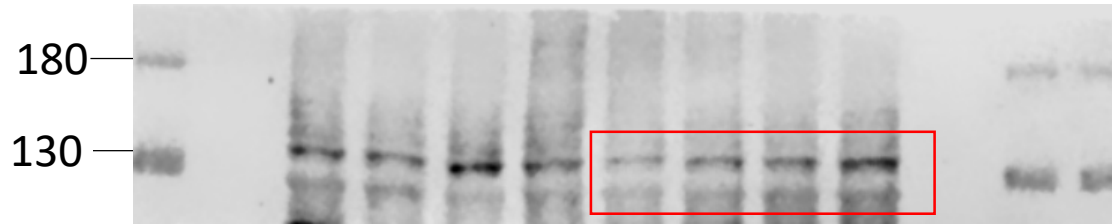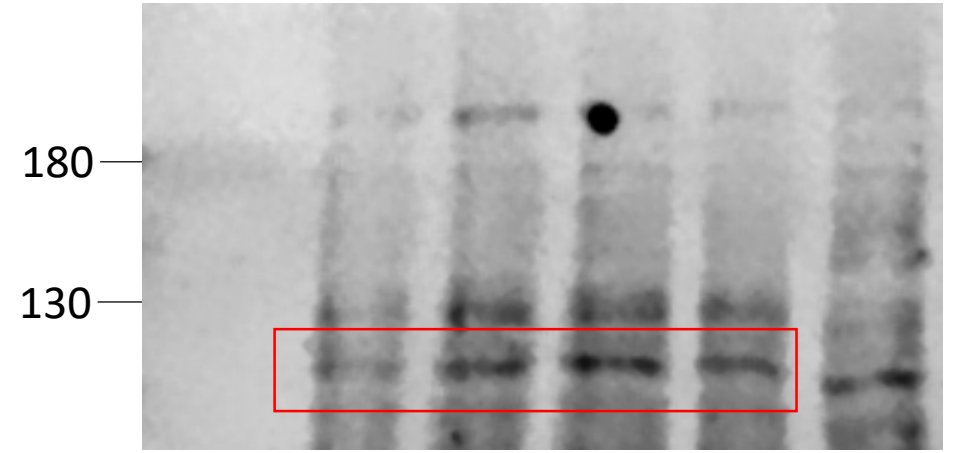

IB: E-cadherin

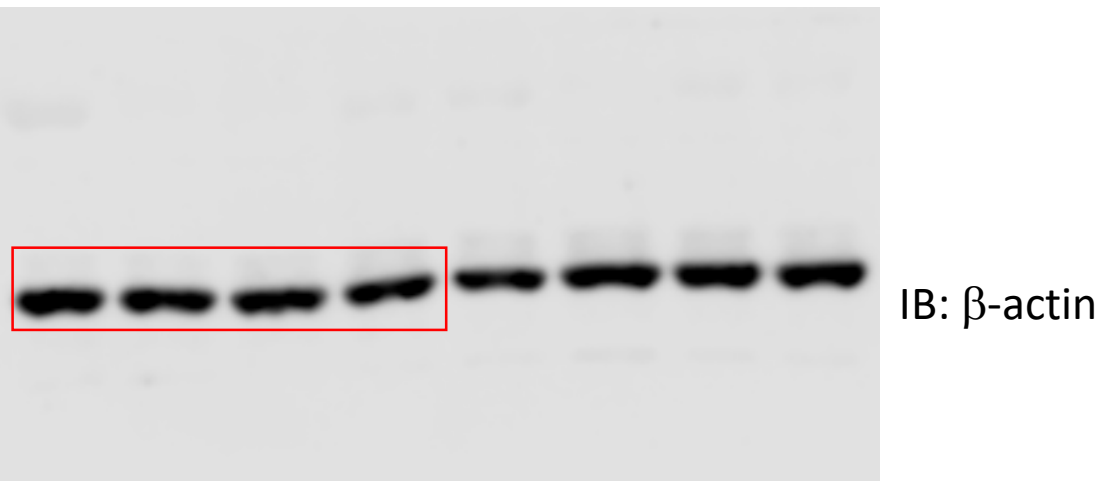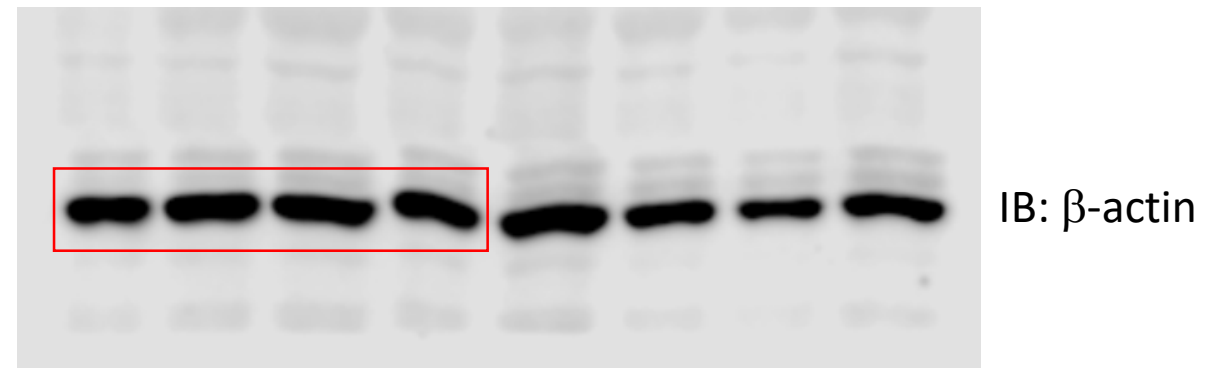

Supplement: 41419_2022_5161_MOESM8_ESM.pdf [file 41419_2022_5161_MOESM8_ESM.pdf]
